# Supplementary material
Source: publisher figshare collection journal article supplement (https://gsapubs.figshare.com/ndownloader/files/34929546)
Supplement: Supplementary file 1 [file 34929546]

Supplementary information for

## **Recurrent tectonic activity in NE Brazil during Pangea breakup: constraints from U-Pb carbonate dating**

Carlos E. Ganade<sup>(1)</sup>; Caue R. Cioffi<sup>(1)</sup>; João Pacífico Machado<sup>(1)</sup>; Tiago Miranda<sup>(2)</sup>; Leonardo B. Lopes<sup>(1)</sup>; Roberto Weinberg<sup>(3)</sup>; Maria Alcione Celestino<sup>(2)</sup>; Bruno Carvalho<sup>(4)</sup>; Marcel Guillong<sup>(5)</sup>; Nick M. W. Roberts<sup>(6)</sup>

<sup>(1)</sup>Geological Survey of Brazil, Rio de Janeiro, Brazil

<sup>(2)</sup>Federal University of Pernambuco, Recife, Brazil

<sup>(3)</sup>Monash University, Clayton, Australia

<sup>(4)</sup>CENPES-PETROBRAS, Rio de Janeiro, Brazil

<sup>(5)</sup>ETH, Zurich, Switzerland

<sup>(6)</sup>Geochronology and Tracers Facility, British Geological Survey, Nottingham, United Kingdom

### **U-Pb carbonate analytical method**

U-Pb analyses were conducted by laser ablation inductively coupled plasma mass spectrometry (LA-ICP-MS) in two facilities with slightly distinct approaches. Sample AR-1 was analyzed at the Geochronology and Tracers Facility, British Geological Survey, UK, while the remaining samples (AR-2, RP-1, RP-2, JB-1, JB-2, JB-3 and JB-4) were analyzed at the Department of Earth Sciences, ETH Zürich, CH. The specific parameters and procedures of each laboratory are tabulated below. Further information, including single spot data, samples and reference materials information, and Tera-Wasserburg plots are available within the U-Pb data tables in the Supplementary Material.

| Laboratory & Sample Preparation |                                                                                      |
|---------------------------------|--------------------------------------------------------------------------------------|
| Laboratory name                 | Geochronology & Tracers Facility, NERC Isotope Geosciences Laboratory                |
| Sample type/mineral             | Carbonate                                                                            |
| Sample preparation              | Sample blocks mounted in epoxy resin                                                 |
| Imaging                         | Optical only                                                                         |
| Laser ablation system           |                                                                                      |
| Make, Model & type              | ESI/New Wave Research, UP193UC                                                       |
| Ablation cell & volume          | NWR TV2                                                                              |
| Laser wavelength (nm)           | 193nm                                                                                |
| Pulse width (ns)                | 4ns                                                                                  |
| Fluence (J.cm <sup>-2</sup> )   | ~7 J/cm <sup>-2</sup>                                                                |
| Repetition rate (Hz)            | 10 Hz                                                                                |
| Spot size (μm)                  | 100 μm                                                                               |
| Sampling mode / pattern         | Static spot                                                                          |
| Carrier gas                     | 100% He, Ar make-up gas from DSN-100 combined using a Y-piece 50% along sample line. |
| Ablation duration (secs)        | 30 secs                                                                              |
| Cell carrier gas flow (l/min)   | 0.7 l/min                                                                            |
| ICP-MS Instrument               |                                                                                      |
| Make, Model & type              | Nu Instruments, Attom, SC-ICP-MS                                                     |
| Sample introduction             | Ablation aerosol                                                                     |
| RF power (W)                    | 1300 W                                                                               |
| Make-up gas flow                | 0.7 l/min Ar                                                                         |
| Detection system                | Single Mascom SEM                                                                    |

|                                                       |                                                                                                                                                                                                                                                               |
|-------------------------------------------------------|---------------------------------------------------------------------------------------------------------------------------------------------------------------------------------------------------------------------------------------------------------------|
| Masses measured                                       | 202, 204, 206, 207, 208, 232, 238                                                                                                                                                                                                                             |
| Integration time per peak (ms)                        | Dwell times of 200 $\mu$ s to 1000 $\mu$ s per peak, 100 sweeps per integration.                                                                                                                                                                              |
| Total integration time per reading (secs)             | 0.35 sec<br>(should represent the time resolution of the data)                                                                                                                                                                                                |
| Sensitivity / Efficiency (%<br>element)               | ~0.2% U                                                                                                                                                                                                                                                       |
| IC Dead time (ns)                                     | 15 ns                                                                                                                                                                                                                                                         |
| Data Processing                                       |                                                                                                                                                                                                                                                               |
| Gas blank                                             | 30 second on-peak zero subtracted                                                                                                                                                                                                                             |
| Calibration strategy                                  | NIST614 glass standard as primary reference material for drift and 207Pb/206Pb ratios (see Roberts et al., 2017); WC-1 carbonate reference material for matrix matching of 206Pb/238U (anchored to initial Pb composition of 0.85, see Roberts et al., 2017). |
| Reference Material info                               | Concentrations use WC1 (Roberts et al., 2017)<br>207Pb/206Pb: NIST614 (Woodhead and Hergt, 2001)<br>206Pb/238U: WC1 (Roberts et al., 2017)<br>Validation with ASH15D (Nuriel et al., 2021)                                                                    |
| Data processing package used /<br>Correction for LIEF | In-house spreadsheet data processing after initial signal integration using Nu Instruments TRA software. No LIEF correction (mean of uncorrected ratios used). IsoplotR (Vermeesch, 2018) for isochrons, intercept ages, and initial Pb compositions.         |
| Mass discrimination                                   | Standard sample bracketing                                                                                                                                                                                                                                    |
| Common-Pb correction,<br>composition and uncertainty  | None applied. Ages calculated from regressions used in Tera-Wasserburg plots.                                                                                                                                                                                 |
| Uncertainty level & propagation                       | Ages are quoted at 2 $\sigma$ absolute, propagation is by quadratic addition. Excess variance of reference material propagated into sample data. Systematic uncertainties include age uncertainty of reference material.                                      |
| Quality control / Validation                          | ASH15D:<br>3.086 $\pm$ 0.087 Ma (n=30; MSWD = 1.6)<br>(without systematic uncertainties propagated)                                                                                                                                                           |

| Laboratory & Sample Preparation |                                                                                           |
|---------------------------------|-------------------------------------------------------------------------------------------|
| Laboratory name                 | Department of Earth Sciences, ETH Zürich                                                  |
| Sample type/mineral             | Carbonate                                                                                 |
| Sample preparation              | Polished thick sections and chips mounted in epoxy                                        |
| Imaging                         | CL8200 Mk5-2 Optical Cathodoluminescence System                                           |
| Laser ablation system           |                                                                                           |
| Make, Model & type              | ASI (Resonetics) RESolution S155                                                          |
| Ablation cell & volume          | Laurin Technic, two-volume cell, effective volume ~1 cm <sup>3</sup>                      |
| Laser wavelength (nm)           | 193nm                                                                                     |
| Pulse width (ns)                | 25ns                                                                                      |
| Fluence (J.cm <sup>-2</sup> )   | ~1.8 J/cm <sup>-2</sup>                                                                   |
| Repetition rate (Hz)            | 5.0 (for 110 µm spot diameter) or 7.4 Hz (for 163 µm spot diameter)                       |
| Spot size (µm)                  | 110 µm or 163 µm                                                                          |
| Sampling mode / pattern         | Static spot                                                                               |
| Carrier gas                     | 100% He in the cell, Ar make-up gas combined in cell above, ablation in funnel.           |
| Ablation duration (secs)        | 40 secs                                                                                   |
| Cell carrier gas flow (l/min)   | 0.5 l/min                                                                                 |
| ICP-MS Instrument               |                                                                                           |
| Make, Model & type              | Thermo Element XR, sector-field single collector ICP-MS with high capacity interface pump |
| Sample introduction             | Ablation aerosol                                                                          |
| RF power (W)                    | 1350-1550 W (optimized daily)                                                             |
| Make-up gas flow                | 0.90 - 1.05 l/min Ar (optimized daily), 2 ml/min N <sub>2</sub>                           |
| Detection system                | Triple (pulse counting, analog, Faraday), cross-calibrated daily                          |

|                                                       |                                                                                                                                                                                                                                                                                                                                                                                                                                                         |
|-------------------------------------------------------|---------------------------------------------------------------------------------------------------------------------------------------------------------------------------------------------------------------------------------------------------------------------------------------------------------------------------------------------------------------------------------------------------------------------------------------------------------|
|                                                       | with $^{238}\text{U}$ , fixed analogue counting factor (ACF) value, all isotopes usually in pulse-counting only (<5 Mcps)                                                                                                                                                                                                                                                                                                                               |
| Masses measured                                       | 202, 204, 206, 207, 208, 232, 235, 238                                                                                                                                                                                                                                                                                                                                                                                                                  |
| Integration time per peak (ms)                        | 11 ms for all masses except 206, 207 (50 ms)                                                                                                                                                                                                                                                                                                                                                                                                            |
| Total integration time per reading (secs)             | 0.174 sec                                                                                                                                                                                                                                                                                                                                                                                                                                               |
| Sensitivity / Efficiency (%<br>element)               | ~1% U                                                                                                                                                                                                                                                                                                                                                                                                                                                   |
| IC Dead time (ns)                                     | 25 ns                                                                                                                                                                                                                                                                                                                                                                                                                                                   |
| Data Processing                                       |                                                                                                                                                                                                                                                                                                                                                                                                                                                         |
| Gas blank                                             | 20 s                                                                                                                                                                                                                                                                                                                                                                                                                                                    |
| Calibration strategy                                  | NIST614 glass standard as primary reference material for drift and $^{207}\text{Pb}/^{206}\text{Pb}$ ratios (see Roberts et al., 2017); WC-1 carbonate reference material for matrix matching of $^{206}\text{Pb}/^{238}\text{U}$ (anchored to initial Pb composition of 0.85, see Roberts et al., 2017); ASH-15D (Nuriel et al., 2021) and JT (Guillong et al., 2020) calcite validation reference materials for assessing accuracy and repeatability. |
| Reference Material info                               | NIST614 (concentration data of Jochum et al., 2011, Pb isotopes of Baker et al., 2004); WC-1 (Roberts et al., 2017); ASH-15-D (Nuriel et al., 2021); JT (Guillong et al., 2020) ; B6 (Pagel et al., 2018).                                                                                                                                                                                                                                              |
| Data processing package used /<br>Correction for LIEF | lomite 2.5, VisualAge for integration, interval selection, and gas blank correction only. In-house spreadsheet data processing. IsoplotR (Vermeesch, 2018) for isochrons, intercept ages, and initial Pb compositions. No separate LIEF correction. $^{238}\text{U}/^{206}\text{Pb}$ corrected to primary. RM assumed to have similar LIEF as samples.                                                                                                  |
| Mass discrimination                                   | Normalized to reference material (sample-standard bracketing)                                                                                                                                                                                                                                                                                                                                                                                           |
| Common-Pb correction,<br>composition and uncertainty  | Not applied. Ages calculated by linear regressions in Tera-Wasserburg concordia plots.                                                                                                                                                                                                                                                                                                                                                                  |
| Uncertainty level & propagation                       | Lower intercept ages are quoted at 2s absolute, propagation is by quadratic addition. Counting statistics uncertainties are propagated to the $^{207}\text{Pb}/^{206}\text{Pb}$ ratios, together with the                                                                                                                                                                                                                                               |

|                              |                                                                                                                                                                                                                                                                                                                                                                                                                                                                                                                                                                                                                       |
|------------------------------|-----------------------------------------------------------------------------------------------------------------------------------------------------------------------------------------------------------------------------------------------------------------------------------------------------------------------------------------------------------------------------------------------------------------------------------------------------------------------------------------------------------------------------------------------------------------------------------------------------------------------|
|                              | uncertainty of the primary RM value and the uncertainty of repeated measurements. The uncertainty value for lower intercept isochron ages includes uncertainties from the primary RM and unsystematic uncertainties, estimated in this work to be 2.5%.                                                                                                                                                                                                                                                                                                                                                               |
| Quality control / Validation | <p>ASH-15-D:<br/>Tera-Wasserburg intercept age: <math>2.86 \pm 0.153</math> Ma (2s, MSWD = 2, n = 22 including internal and 2.5% total external uncertainty) without <math>^{230}\text{Th}</math> disequilibrium correction.</p> <p>JT:<br/>Tera-Wasserburg intercept age: <math>13.07 \pm 0.49</math> Ma (2s, MSWD = 1.5, n = 22 including internal and 2.5% total external uncertainty)</p> <p>B6:<br/>Tera-Wasserburg intercept age: <math>40.7 \pm 1.25</math> Ma (2s, MSWD = 1.5, n = 22 including internal and 2.5% total external uncertainty)</p> <p>Systematic uncertainty for propagation is 2.5 % (2s)</p> |

## References

Baker, J., Peate, D., Waight, T., Meyzen, C., 2004. Pb isotopic analysis of standards and samples using a  $^{207}\text{Pb}$ - $^{204}\text{Pb}$  double spike and thallium to correct for mass bias with a double-focusing MC-ICP-MS. *Chemical Geology* 211, 275-303.

Guillong, M., Wotzlaw, J-F., Looser, N., Laurent, O., 2020. Evaluating the reliability of U-Pb laser ablation inductively coupled plasma mass spectrometry (LA-ICP-MS) carbonate geochronology: matrix issues and a potential calcite validation reference material. *Geochronology* 2, 155-167.

Jochum, K.P., Weis, U., Stoll, B., Kuzmin, D., Yang, Q., Raczek, I., Jacob, D.E., Stracke, A., Birbaum, K., Frick, D.A., Günther, D., Enzweiler, J., 2011. Determination of reference values for NIST SRM 610-617 glasses following ISO guidelines. *Geostandards and Geoanalytical Research* 35, 397-429.

Nuriel, P., Wotzlaw, J-F., Ovtcharova, M., Vaks, A., Stremtan, C., Sala, M., Roberts, N.M.W., Kylander-Clark, A.R.C., 2021. The use of ASH-15 flowstone as matrix-matched reference material for laser-ablation U-Pb geochronology of calcite. *Geochronology* 3, 35-47.

Pagel, M., Bonifacie, M., Schneider, D., Gautheron, C., Brigaud, B., Calmels, D., Cros, A., Saint-Bezar, B., Landrein, P., Sutcliffe, C., Davis, D., Chaduteau, C., 2018. Improving paleohydrological and diagenetic reconstructions in calcite veins and breccia of a

sedimentary basin by combining  $\Delta_{47}$  temperature,  $\delta^{18}\text{O}_{\text{water}}$  and U-Pb age. *Chemical Geology* 481, 1-17.

Roberts, N.M.W., Rasbury, E.T., Parrish, R.R., Smith, C.J., Horstwood, M.S.A., Condon, D.J., 2017. A calcite reference material for LA-ICP-MS U-Pb geochronology. *Geochemistry, Geophysics, Geosystems* 18, 2807-2814.

Vermeesch, P., 2018. IsoplotR: A free and open toolbox for geochronology. *Geoscience Frontiers* 9, 1479-1493.

Woodhead, J.D., Hergt, J.M., 2001. Strontium, neodymium and lead analyses of NIST glass certified reference materials: SRM 610, 612, 614. *Geostandards Newsletter* 25, 261-266.
